# Supplementary material for: Synthesis of Synthetic Musks: A Theoretical Study Based on the Relationships between Structure and Properties at Molecular Scale
Source: MDPI journal article supplement (doi:10.3390/ijms24032768), 2023-02-01
Supplement: s1 [file s1]

## Supplement Materials

### Synthesis of Synthetic Musks: A Theoretical Study Based on the Relationships between Structure and Properties at Molecular Scale

**Xixi Li** <sup>1,2,3,†</sup>, **Hao Yang** <sup>4,†</sup>, **Yuanyuan Zhao** <sup>4</sup>, **Qikun Pu** <sup>4</sup>, **Tingzhi Xu** <sup>4</sup>, **Rui Li** <sup>1,2,\*</sup> and **Yu Li** <sup>4,\*</sup>

<sup>1</sup> State Key Laboratory of Environmental Criteria and Risk Assessment, Chinese Research Academy of Environmental Sciences, Beijing 100012, China

<sup>2</sup> State Environmental Protection Key Laboratory of Ecological Effect and Risk Assessment of Chemicals, Chinese Research Academy of Environmental Sciences, Beijing 100012, China

<sup>3</sup> Northern Region Persistent Organic Pollution Control (NRPOP) Laboratory, Faculty of Engineering and Applied Science, Memorial University, St. John's, NL A1B 3X5, Canada

<sup>4</sup> MOE Key Laboratory of Resources and Environmental Systems Optimization, North China Electric Power University, Beijing 102206, China

\* Correspondence: [lirui@craes.org.cn](mailto:lirui@craes.org.cn) (R.L.); [liyuxx@ncepu.edu.cn](mailto:liyuxx@ncepu.edu.cn) (Y.L.)

<sup>†</sup> These authors contributed equally to this work.

Table S1 Molecular structures of 88 SMs and SMs derivatives

| Name | Molecular structures | Name | Molecular structures |
|------|----------------------|------|----------------------|
| D1   |                      | D45  |                      |
| D2   |                      | D46  |                      |
| D3   |                      | D47  |                      |
| D4   |                      | D48  |                      |
| D5   |                      | D49  |                      |
| D6   |                      | D50  |                      |
| D7   |                      | D51  |                      |
| D8   |                      | D52  |                      |

D9

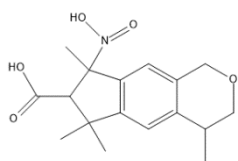

D10

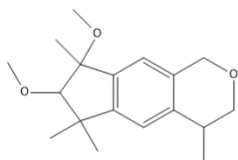

D11

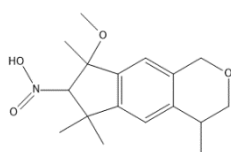

D12

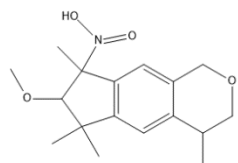

D13

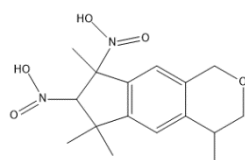

D14

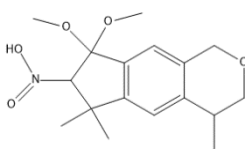

D15

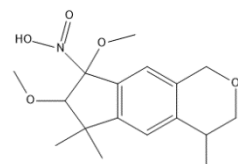

D53

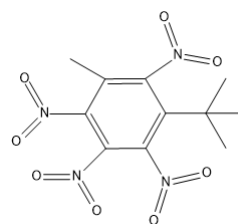

D54

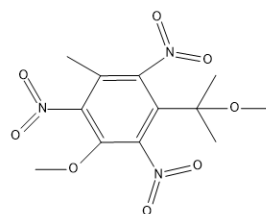

D55

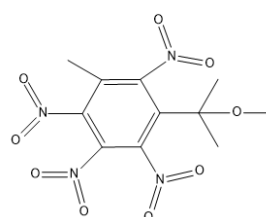

D56

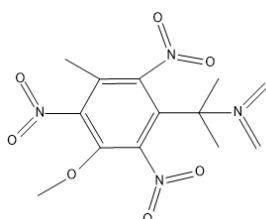

D57

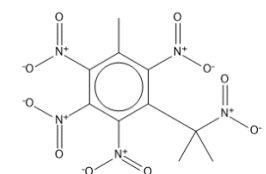

D58

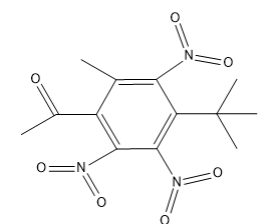

D59

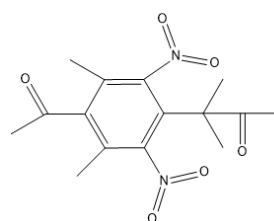

D16

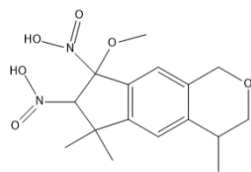

D17

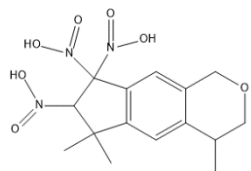

D18

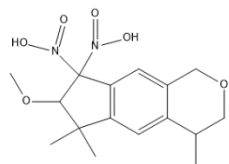

D19

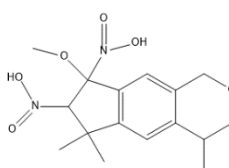

D20

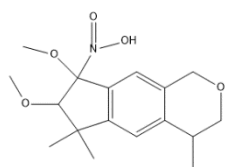

D21

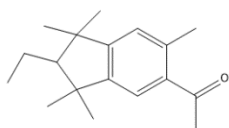

D22

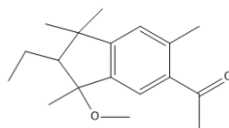

D60

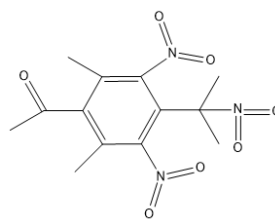

D61

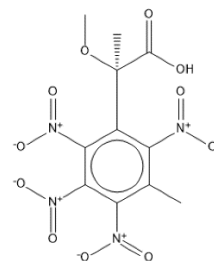

D62

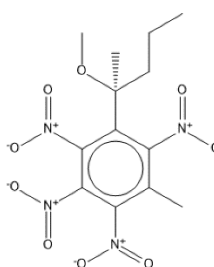

D63

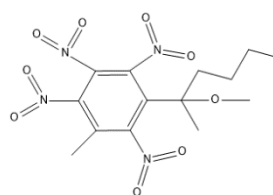

D64

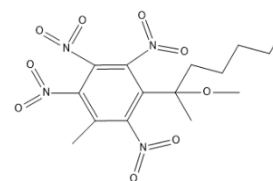

D65

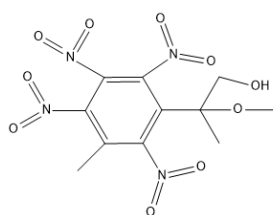

D66

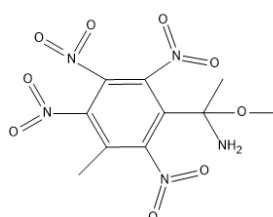

D23

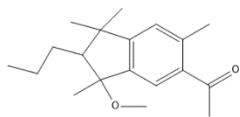

D24

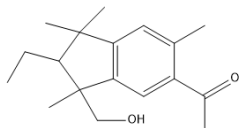

D25

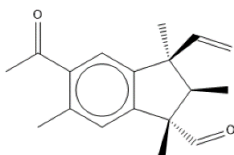

D26

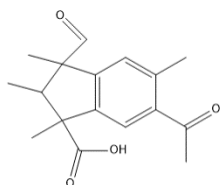

D27

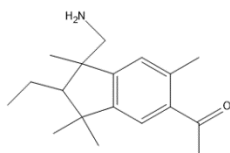

D28

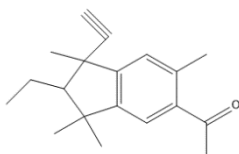

D29

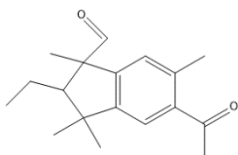

D67

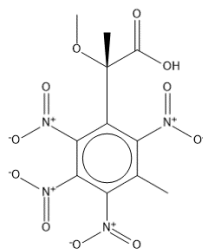

D68

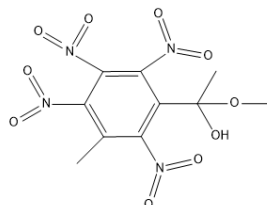

D69

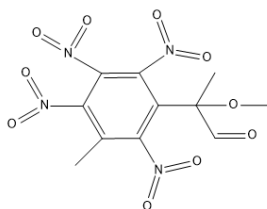

D70

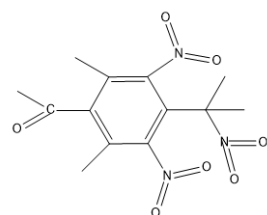

D71

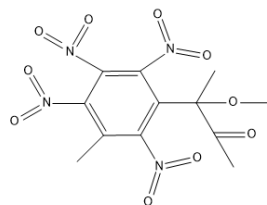

D72

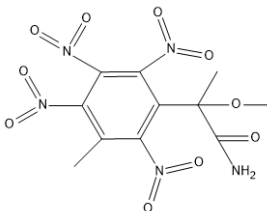

D73

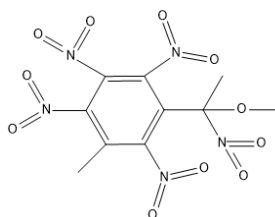

D30

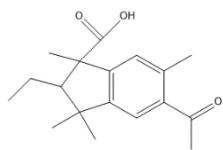

D31

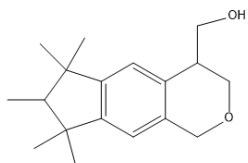

D32

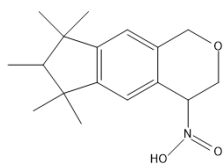

D33

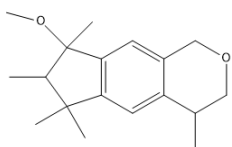

D34

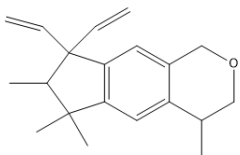

D35

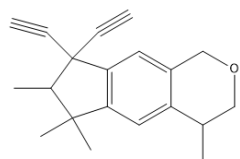

D36

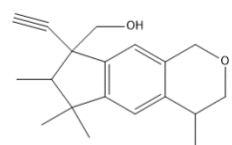

D74

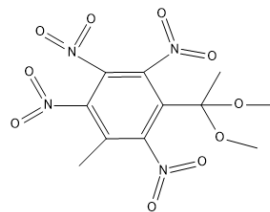

D75

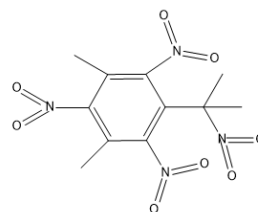

D76

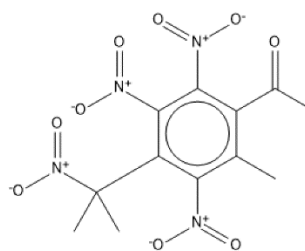

D77

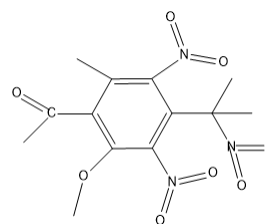

Phantolide

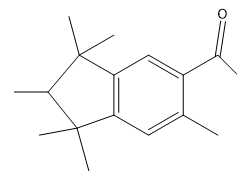

Celestolide

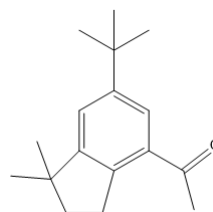

Tonalid

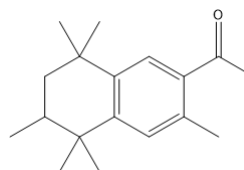

|     |                                                                                     |               |                                                                                       |
|-----|-------------------------------------------------------------------------------------|---------------|---------------------------------------------------------------------------------------|
| D37 | 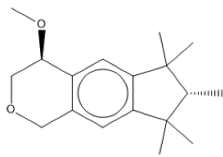   | Galaxolide    |     |
| D38 |    | Versalide     |     |
| D39 |    | Musk xylene   |     |
| D40 |    | Muscone       |    |
| D41 |  | Musk methy    |   |
| D42 |  | Musk ambrette |  |
| D43 |  | Moskene       |  |
| D44 |  | Musk ketone   |  |

```

import pandas as pd
import numpy as np
from scipy.stats import pearsonr

dataSet = pd.read_excel("pil.xlsx")
pearson_result=dataSet.corr()
pearson_result.to_excel("person.xlsx")

def excuteFilter(x, pearson_result, dataSet, path):

    header=pearson_result.columns

    data = pearson_result.values

    indices = np.triu_indices_from(data)

    [rows, cols] = data.shape
    addlist = []
    removelist = []
    removeindex = []

    for i in range(rows):
        if header[i] not in removelist:
            for j in range(cols):
                if j < i:
                    if data[i, j]>x or data[i, j]<-x:
                        if header[j] in addlist:
                            if header[i] not in removelist:
                                removelist.append(header[i])
                                continue
                        if header[i] not in addlist:
                            addlist.append(header[i])
                        if header[j] not in removelist:
                            removelist.append(header[j])

    retainList = []
    for col in header:
        if col not in removelist:
            retainList.append(col)
            print(col)

    dataSet[retainList].to_excel(path, index = False)

excuteFilter(0.6, pearson_result, dataSet, "retainDataSet.xlsx")

import seaborn as sns
import matplotlib.pyplot as plt

dataframe = pd.read_excel("retainDataSet.xlsx")
dcorr=dataframe.corr()

from matplotlib import rcParams

plt.rcParams['font.family']='Times New Roman']
plt.rcParams['axes.unicode_minus']=False
plt.mathtext(fontfamily='Times New Roman')
sns.set(font_scale=1.3)
plt.subplots(figsize=(20, 20))

fig=sns.heatmap(
    dcorr,
    cmap='YlGnBu',
    annot=True,
    fmt=".2f",
    mask=np.triu(np.ones_like(dcorr, dtype=bool))
)

fig_path="retainHeatmap.jpg";
heatmap = fig.get_figure()
heatmap.savefig(fig_path, dpi = 600)

```

Figure. S1 Processing code for Pearson correlation coefficient



```

In [1]: import numpy as np
import pandas as pd
from pulearn import BaggingPuClassifier
from sklearn.tree import DecisionTreeClassifier
from sklearn.ensemble import RandomForestClassifier
from sklearn.svm import SVC
pd.set_option('max_columns', 1000)
pd.set_option('max_row', 300)
pd.set_option('display.float_format', lambda x: '%.5f' % x)
pd.set_option('display.max_rows', None)
pd.set_option('display.max_columns', None)
pd.set_option('max_colwidth', 10000)
import sys
np.set_printoptions(threshold=sys.maxsize)

In [2]: df = pd.read_excel("PU1.xlsx", header = None)

In [3]: X=df.iloc[:, :-1]
y=df.iloc[:, -1]

In [4]: for i in range(1, 100):
    bc = BaggingPuClassifier(
        RandomForestClassifier(
            n_estimators =5,
            random_state =0,
            criterion='gini',
            min_samples_split=2,
            max_features='auto',
        ),
        n_estimators =i,
        max_samples=sum(y),
        n_jobs=-1,
        random_state =0
    )
    bc.fit(X, y)
    score=bc.oob_score_
    print(' i=' +str(i)+ ' score', score)

...

In [9]: bc = BaggingPuClassifier(
    RandomForestClassifier(
        n_estimators =5,
        random_state =0,
        criterion='gini',
        min_samples_split=2,
        max_features='auto',
    ),
    n_estimators =30,
    max_samples = sum(y),
    n_jobs = -1,
    random_state =0
)
bc.fit(X, y)

Out[9]: BaggingPuClassifier(base_estimator=RandomForestClassifier(n_estimators=5,
        random_state=0),
        max_samples=11, n_estimators=30, n_jobs=-1, random_state=0)

In [10]: score=bc.oob_score_
print(score)

0.7045454545454546

In [11]: print(bc.oob_decision_function_)

...

In [12]: bc.predict_proba(X)

...

```

Figure. S2 Processing code for bagging-Random Forests

```

import numpy as np
import pandas as pd
from pulearn import BaggingPuClassifier
from pulearn import ElkanotoPuClassifier
from sklearn.tree import ExtraTreeClassifier
from pulearn import WeightedElkanotoPuClassifier
from sklearn.tree import DecisionTreeClassifier
from sklearn.ensemble import RandomForestClassifier
pd.set_option('max_columns', 1000)
pd.set_option('max_row', 300)
pd.set_option('display.float_format', lambda x: '%.5f' % x)
pd.set_option('display.max_rows', None)
pd.set_option('display.max_columns', None)
pd.set_option('max_colwidth', 10000)
import sys
np.set_printoptions(threshold=sys.maxsize)

```

```

df = pd.read_excel("PU1.xlsx", header = None)
X=df.iloc[:, :-1]
y=df.iloc[:, -1]

```

```

for i in range(100, 500):
    bc = BaggingPuClassifier(
        ExtraTreeClassifier(),
        n_estimators=i,
        max_samples=sum(y),
        n_jobs=-1,
        random_state=0,
        #verbose=i
    )
    bc.fit(X, y)
    score=bc.oob_score_
    print('i=' +str(i)+' score', score)

```

```

bc =BaggingPuClassifier(
    ExtraTreeClassifier(),
    n_estimators =416,
    max_samples = sum(y),
    n_jobs = -1,
    random_state = 0,
)
bc.fit(X, y)

```

```

BaggingPuClassifier(base_estimator=ExtraTreeClassifier(), max_samples=11,
                    n_estimators=416, n_jobs=-1, random_state=0)

```

```

print("model score:", bc.oob_score_)

```

```

model score: 0.7272727272727273

```

```

print(bc.oob_decision_function_)

```

...

```

bc.predict_proba(X)

```

Figure. S3 Processing code for bagging-Extremely Randomized Tree

```

import numpy as np
import pandas as pd
from pulearn import BaggingPuClassifier
from sklearn.tree import DecisionTreeClassifier
from sklearn.ensemble import RandomForestClassifier
from sklearn.neighbors import KNeighborsClassifier
from sklearn.svm import SVC
from pulearn import ElkanotoPuClassifier
pd.set_option('max_columns',1000)
pd.set_option('display.float_format', lambda x:' %.5f' % x)
pd.set_option('display.max_rows',None)
pd.set_option('display.max_columns',None)
pd.set_option('max_colwidth',10000)
import sys
np.set_printoptions(threshold=sys.maxsize)
from sklearn.neural_network import MLPClassifier
from sklearn.ensemble import AdaBoostClassifier
from sklearn.ensemble import GradientBoostingClassifier

```

```
df = pd.read_excel("PU1.xlsx", header = None)
```

```

X=df.iloc[:, :-1]
y=df.iloc[:, -1]

```

```

for i in range(50,500,50):
    bc = BaggingPuClassifier(
        GradientBoostingClassifier(
            n_estimators = 441,
            random_state=0,
            learning_rate=0.5
        ),
        n_estimators =i,
        max_samples=sum(y),
        n_jobs=-1,
        random_state =0
    )
    bc.fit(X,y)
    score=bc.oob_score_
    print(' i=' +str(i)+ ' score', score)

```

```

bc = BaggingPuClassifier(
    GradientBoostingClassifier(
        n_estimators = 441,
        random_state=0,
        learning_rate=0.5
    ),
    n_estimators =900,
    max_samples = sum(y),
    n_jobs = -1,
    random_state =0
)
bc.fit(X, y)

```

```

BaggingPuClassifier(base_estimator=GradientBoostingClassifier(learning_rate=0.5,
                                                              n_estimators=441,
                                                              random_state=0),
                    max_samples=11, n_estimators=900, n_jobs=-1,
                    random_state=0)

```

```

score=bc.oob_score_
print(score)

```

```
0.7727272727272727
```

```
print(bc.oob_decision_function_)
```

...

```
bc.predict_proba(X)
```

...

Figure. S4 Processing code for bagging-Gradient Boosting
